# Supplementary material for: Remote Steric Control of the Tetrahedral Coordination Geometry around Heteroleptic Copper(I) Bis(Diimine) Complexes
Source: MDPI journal article supplement (doi:10.3390/molecules28030983), 2023-01-18
Supplement: s1 [file s1]

# **Remote steric control of the tetrahedral coordination geometry around heteroleptic copper(I) bis(diimine) complexes**

Jordan L. Appleton, Christophe Gourlaouen\* and Romain Ruppert\*

## **Supporting information**

|                                                                                         |    |
|-----------------------------------------------------------------------------------------|----|
| Materials and Methods                                                                   | 02 |
| References                                                                              | 03 |
| Complex C1 : preparation, characterization, <sup>1</sup> H and <sup>13</sup> C NMR data | 04 |
| Complex C2 : preparation, characterization, <sup>1</sup> H and <sup>13</sup> C NMR data | 06 |
| Complex C3 : preparation, characterization, <sup>1</sup> H and <sup>13</sup> C NMR data | 08 |
| Complex C4 : preparation, characterization, <sup>1</sup> H and <sup>13</sup> C NMR data | 10 |
| Complex C5 : preparation, characterization, <sup>1</sup> H and <sup>13</sup> C NMR data | 12 |
| Complex C6 : preparation, characterization, <sup>1</sup> H and <sup>13</sup> C NMR data | 14 |
| Complex C7 : preparation, characterization, <sup>1</sup> H and <sup>13</sup> C NMR data | 16 |
| Complex C8 : preparation, characterization, <sup>1</sup> H and <sup>13</sup> C NMR data | 18 |
| X-ray structure informations                                                            | 20 |
| Detailed X-ray experimental procedures                                                  | 21 |
| NCI interactions for compounds C6 and C8                                                | 23 |

## Materials and Methods

All reagents and solvents were purchased from commercial sources and were used as received. The diaryl phenanthroline ligand was prepared following a previously published procedure [1]. The  $\text{MnO}_2$  was from Honeywell Fluka (G1890). Dichloromethane was distilled from calcium hydride, THF and toluene from sodium/benzophenone ketyl. Most of the experiments were carried out under inert atmosphere by using standard Schlenk techniques. Chromatographic separations were performed using Merck silica gel (40-63  $\mu\text{m}$ ).

$^1\text{H}$  and  $^{13}\text{C}$  were performed on Bruker Avance 400, 500 or 600 MHz spectrometers equipped with a cryoprobe.  $\text{CDCl}_3$  was used as a solvent and the spectra were recorded at 25 °C. Chemical shifts ( $\delta$  (ppm)) are shown relative to TMS. UV-visible spectra were recorded on a Cary 5000 UV/vis/NIR double-beam spectrometer in dichloromethane. Emission and lifetime studies were carried out on a HORIBA scientific fluoromax spectrofluorometer in distilled dichloromethane. Lifetime studies were carried out using a nanoLED at 456 nm and a colloidal silica suspension in water as a prompt. ESI MS were collected on a Bruker Daltonics MicroTOF and MALDI MS were collected on a Bruker Autoflex II TOF-TOF instrument in positive ionisation mode with dithranol as a matrix. Measurements were carried out by Stéphanie Coutin (Service de Spectrométrie de Masse, Institut de Chimie, Université de Strasbourg). Elemental analysis was performed on a ThermoFischer Scientific Flash2000 by the Service d'Analyses de l'Institut de Chimie de Strasbourg (Martine Heinrich, Noémie Bourgeois). Electrochemical measurements were carried out using a glassy carbon working electrode in distilled dichloromethane with  $\text{NBu}_4\text{PF}_6$  (0.1 M) as the electrolyte and ferrocenium/ferrocene ( $\text{Fc}^+/\text{Fc}$ ) couple as an internal reference. The three electrodes were connected to a computerised electrochemical device (Biologic SP-150). X-ray analysis was performed by Dr Lydia Karmazin and Corinne Bailly (Service de radiocristallographie, Institut de Chimie, Strasbourg) using a Bruker APEX II DUO Kappa-CCD diffractometer.

## DFT Calculations

The calculations were performed with the ADF 2019 package at DFT level of theory using the B3LYP functional [2]. Scalar relativistic effects were included using zero order regular approximated (ZORA) Hamiltonian [3]. All atoms were described by the TZP basis set. Solvent corrections (dichloromethane) were introduced through a PCM (Polarisable Continuum Model). Van der Waals forces were described through Grimme's corrections [4]. All structures were fully optimized. Absorption spectra were computed by mean of TD-DFT on these optimized structures and spin-orbit coupling added by perturbation of the TD-DFT results. Excited state geometries were optimized in the same conditions. The nature of the computed electronic transitions was determined by mean of THEOdore analysis [5] of the TD-DFT results.

A second set of calculations were performed with GAUSSIAN 09 (version D.01) at DFT level of theory (B3LYP functional). All atoms were described by 6-31+G\*\* basis set. Solvent corrections (dichloromethane) were introduced through a PCM (Polarisable Continuum Model). Van der Waals forces were described through Grimme's corrections. The structures were fully optimised. Non-covalent interactions were studied by mean of NCIPLOT [6] performed on the wavefunction of the optimized structures.

## References

1. Appleton, J. L.; Silber, V.; Karmazin, L.; Bailly, C.; Chambron, J.-C.; Weiss, J.; Ruppert, R. *Eur. J. Org. Chem.* **2020**, 7320-7326.
2. Becke, A. D. *J. Chem. Phys.* **1993**, 98, 5648-5652.
3. ADF, SCM, Theoretical Chemistry, Vrije Universiteit, Amsterdam, The Netherlands. Available online: <https://www.scm.com/doc/ADF/index.html> (accessed on 1 June 2019).
4. Grimme, S.; Antony, J.; Ehrlich, S.; Krieg, H. *J. Chem. Phys.* **2010**, 132, 154104.
5. Plasser, F. *J. Chem. Phys.* **2020**, 152, 08418.
6. Contreras-Garcia, J.; Johnson, E. R.; Keinan, S.; Chaudret, R.; Piquemal, J.-P.; Beratan, D. N.; Yang, W. *J. Chem. Theory Comput.* **2011**, 7, 625-632.

[Cu(2,9-(4-(*tert*-butyl)-2,6-dimethylphenyl)-1,10-phenanthroline)(1,10-phenanthroline)]PF<sub>6</sub> (**C1**)

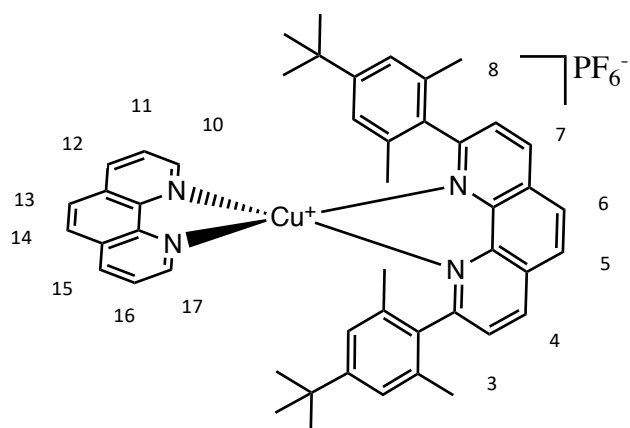

Chemical formula: C<sub>48</sub>H<sub>48</sub>CuF<sub>6</sub>N<sub>4</sub>P

Exact mass: 888.28

Molecular weight: 889.45

Under argon and at rt, to a solution of [Cu(CH<sub>3</sub>CN)<sub>4</sub>]PF<sub>6</sub> (58 mg, 0.16 mmol) in dichloromethane (20 mL) was added *via* cannula transfer a degassed solution of ligand **L1** (86 mg, 0.17 mmol) in dichloromethane (10 mL). The solution turned yellow and was stirred for 1 h. A solution of 1,10-phenanthroline (28 mg, 0.16 mmol) in degassed dichloromethane (10 mL) was then added *via* cannula transfer, rendering the solution red. The solution was once again stirred for 1 h. Solvent was then evaporated and the solid was dissolved in the minimum amount of dichloromethane and precipitated by addition of diethyl ether/pentane (1:1) to afford complex **C1** (98 mg, 0.11 mmol, 69%).

<sup>1</sup>H NMR (500 MHz, CDCl<sub>3</sub>) δ 8.70 (d, *J* = 8.0 Hz, 2H, H<sub>4</sub> and H<sub>7</sub>), 8.55 (dd, *J* = 4.7, 1.5 Hz, 2H, H<sub>10</sub> and H<sub>17</sub>), 8.36 (dd, *J* = 8.1, 1.5 Hz, 2H, H<sub>12</sub> and H<sub>15</sub>), 8.23 (s, 2H, H<sub>5</sub> and H<sub>6</sub>), 7.83 (d, *J* = 8.0 Hz, 2H, H<sub>3</sub> and H<sub>8</sub>), 7.78 (dd, *J* = 4.7, 8.1, 2H, H<sub>11</sub> and H<sub>16</sub>), 7.79 (s, 2H, H<sub>13</sub> and H<sub>14</sub>), 6.15 (s, 4H, H<sub>Ar</sub>), 1.77 (s, 12H, H<sub>Me</sub>), 0.62 (s, 18H, H<sub>tBu</sub>).

<sup>13</sup>C NMR (125 MHz, CDCl<sub>3</sub>) δ 159.1, 151.1, 147.7 (CH), 143.9, 142.8, 137.4 (CH), 137.0, 136.2 (CH), 134.2, 128.3, 127.9, 126.8 (CH), 126.6 (CH), 126.3 (CH), 124.7 (CH), 123.1 (CH), 33.6, 30.7 (CH<sub>3</sub>), 20.4 (CH<sub>3</sub>).

Anal. calcd for C<sub>48</sub>H<sub>48</sub>CuF<sub>6</sub>N<sub>4</sub>P: C, 64.82; H, 5.44; N, 6.30. Found: C, 64.59; H, 5.47; N, 6.22.

**C1:  $^1\text{H}$  NMR**

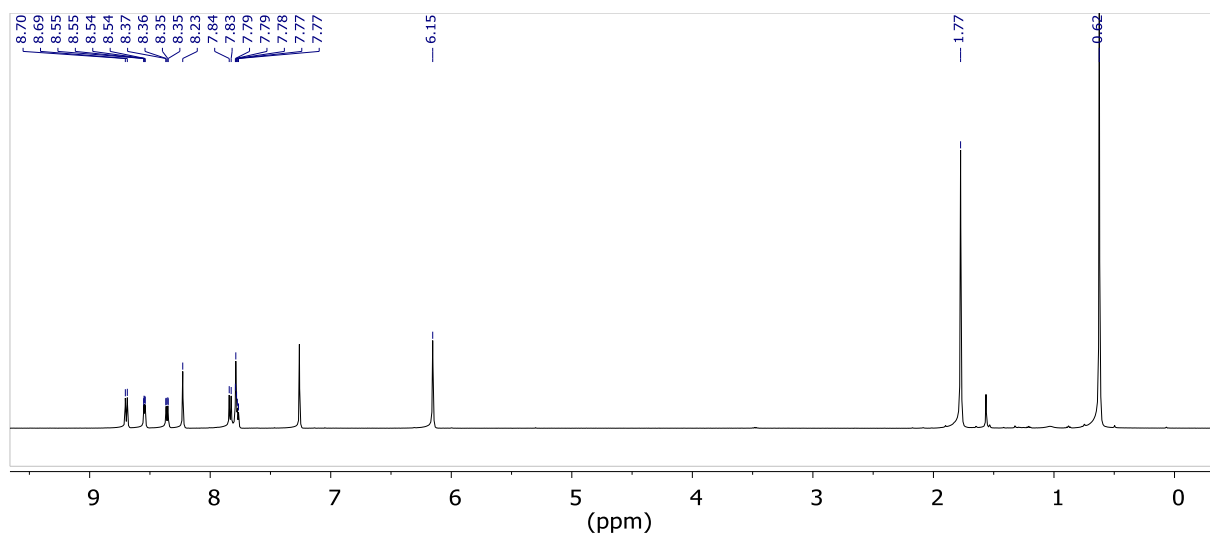

**C1:  $^{13}\text{C}$  NMR**

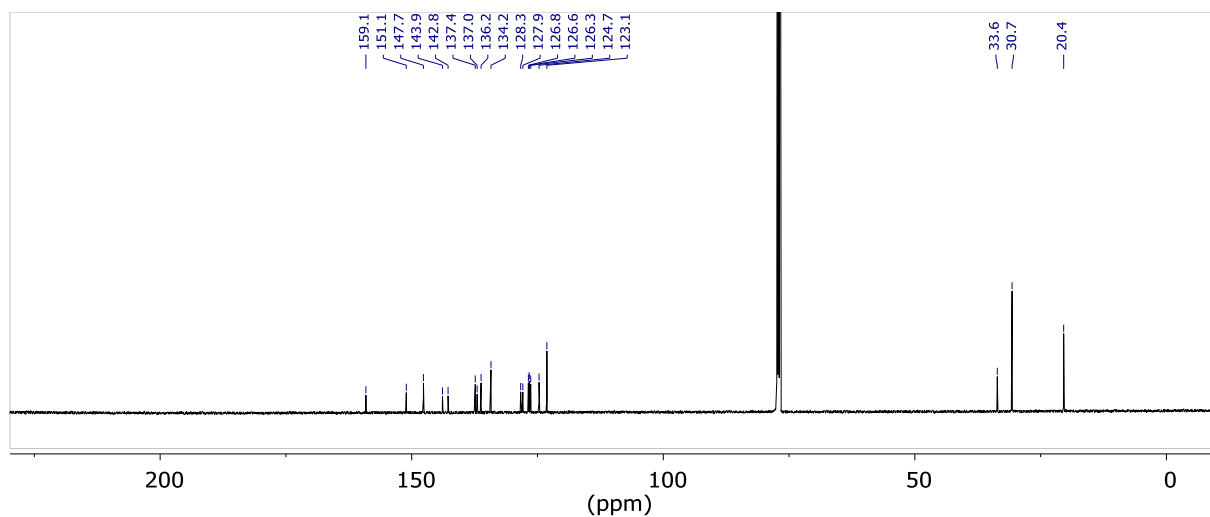

**C1: DEPT 135**

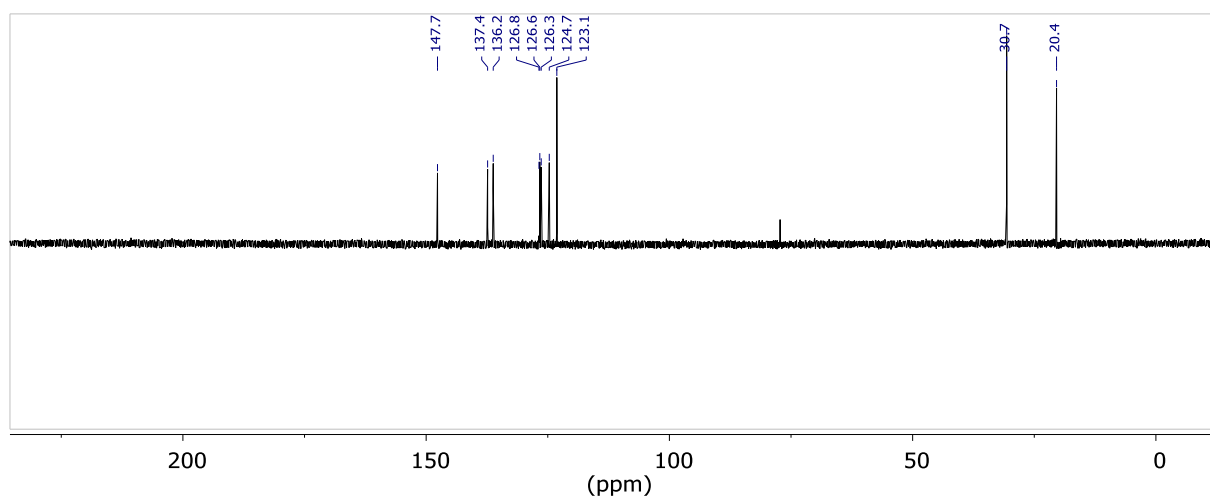

**Figure S1:**  $^1\text{H}$ ,  $^{13}\text{C}$  and DEPT NMR spectra of complex C1.

[Cu(2,9-(4-(*tert*-butyl)-2,6-dimethylphenyl)-1,10-phenanthroline)(2,9-dimethyl-1,10-phenanthroline)]PF<sub>6</sub> (**C2**)

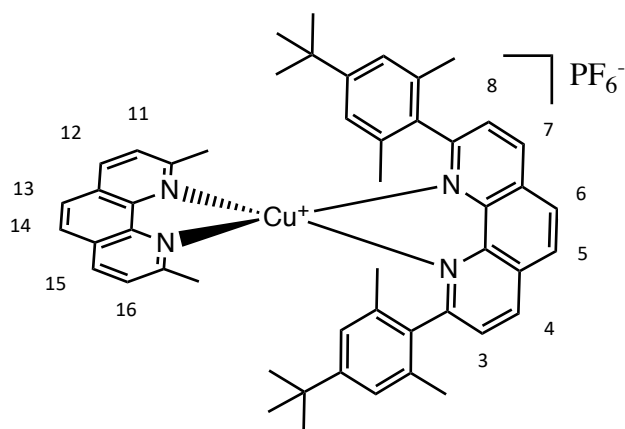

Chemical formula: C<sub>30</sub>H<sub>52</sub>CuF<sub>6</sub>N<sub>4</sub>P

Exact mass: 916.31

Molecular weight: 917.50

Complex **C2** was synthesised using the same method as for **C1**, with the addition of 2,9-dimethyl-1,10-phenanthroline (29 mg, 0.14 mmol) as opposed to 1,10-phenanthroline to yield **C2** (90 mg, 0.098 mmol, 61%).

<sup>1</sup>H NMR (500 MHz, CDCl<sub>3</sub>) δ 8.71 (d, *J* = 8.2 Hz, 2H, H<sub>4</sub> and H<sub>7</sub>), 8.23 (s, 2H, H<sub>5</sub> and H<sub>6</sub>), 8.19 (d, *J* = 8.2 Hz, 2H, H<sub>12</sub> and H<sub>15</sub>), 7.82 (d, *J* = 8.2 Hz, 2H, H<sub>11</sub> and H<sub>16</sub>), 7.72 (s, 2H, H<sub>13</sub> and H<sub>14</sub>), 7.49 (d, *J* = 8.2 Hz, 2H, H<sub>3</sub> and H<sub>8</sub>), 6.29 (s, 4H, H<sub>Ar</sub>), 2.19 (s, 6H, H<sub>Me</sub>), 1.64 (s, 12H, H<sub>Me</sub>), 0.76 (s, 18H, H<sub>tBu</sub>).

<sup>13</sup>C NMR (500 MHz, CDCl<sub>3</sub>) δ 159.5, 156.8, 151.3, 143.8, 142.4, 137.6 (CH), 136.6, 136.6 (CH), 134.3, 128.2, 127.1 (CH), 126.9 (CH), 126.7, 125.6 (CH), 124.8 (CH), 123.3 (CH), 33.8, 30.8 (CH<sub>3</sub>), 26.5 (CH<sub>3</sub>), 20.2 (CH<sub>3</sub>).

Anal. calcd for C<sub>50</sub>H<sub>52</sub>CuF<sub>6</sub>N<sub>4</sub>P: C, 65.45; H, 5.21; N, 6.11. Found: C, 65.34; H, 5.75; N, 6.08.

Crystal data from Et<sub>2</sub>O/CH<sub>2</sub>Cl<sub>2</sub> for **C2**. C<sub>54</sub>H<sub>62</sub>CuF<sub>6</sub>N<sub>4</sub>P, *M* = 991.58 g.mol<sup>-1</sup> monoclinic, space group P2<sub>1</sub>/c, *a* = 13.4772(6) Å, *b* = 19.4894 (8) Å, *c* = 19.6875(9) Å, α = 90°, β = 105.2060(10)°, γ = 103.534(2)°, *V* = 5027.6(4) Å<sup>3</sup>, *Z* = 4, ρ<sub>calc</sub> = 1.310 Mg/m<sup>3</sup>, *T* = 173(2) K, MoK<sub>α</sub> = 0.71073 Å, 1.873670 < θ < 29.204, transmission factors: *T*<sub>min</sub>/*T*<sub>max</sub> = 0.6888/0.7458, 99929 reflections measured, 13604 unique reflections, *R*<sub>1</sub> = 0.0731, *wR*<sub>2</sub> = 0.1854, GoF = 1.038.

**C2:  $^1\text{H}$  NMR**

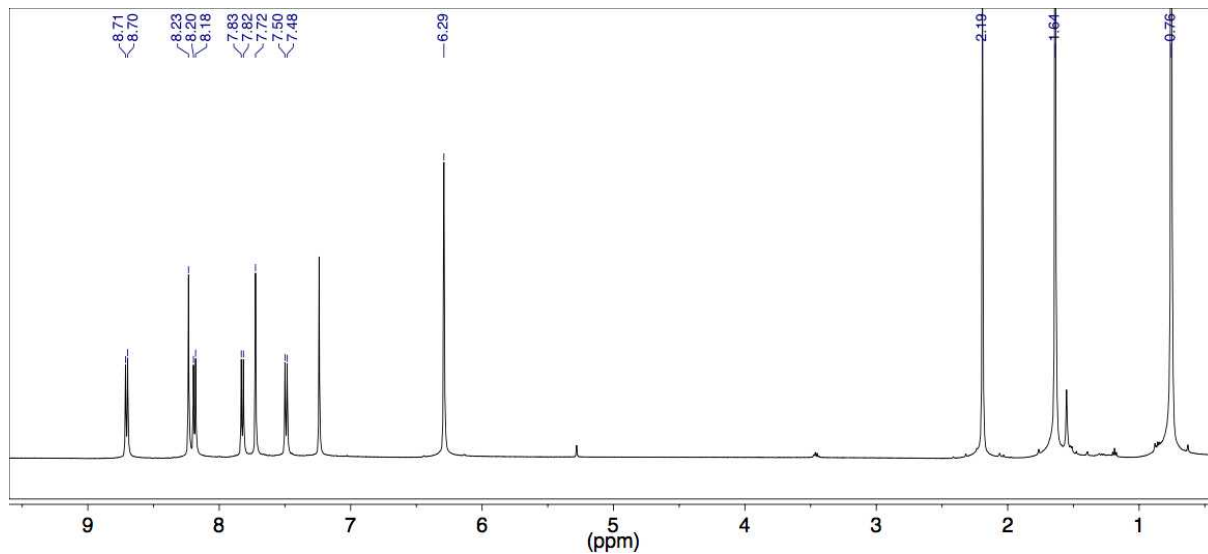

**C2:  $^{13}\text{C}$  NMR**

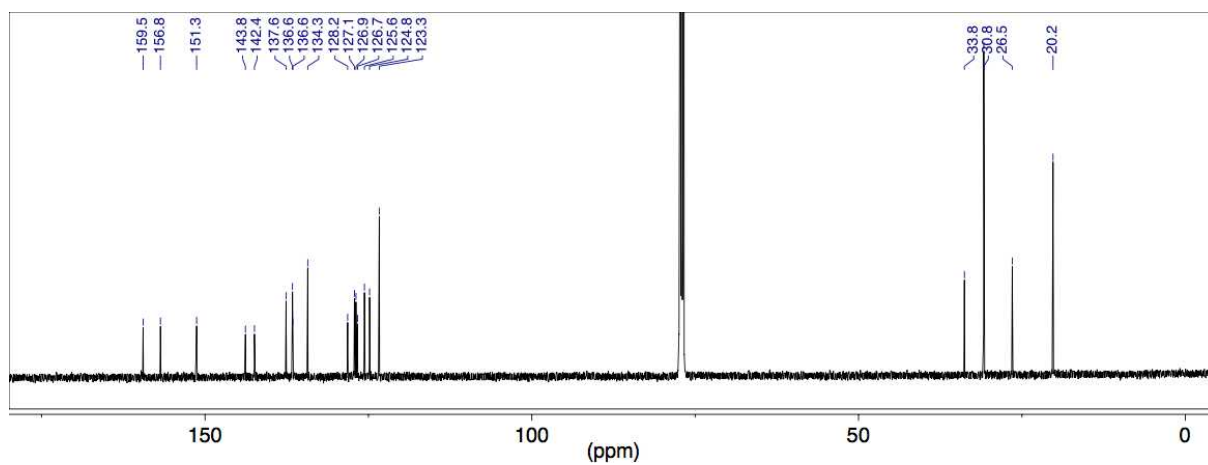

**C2: DEPT 135**

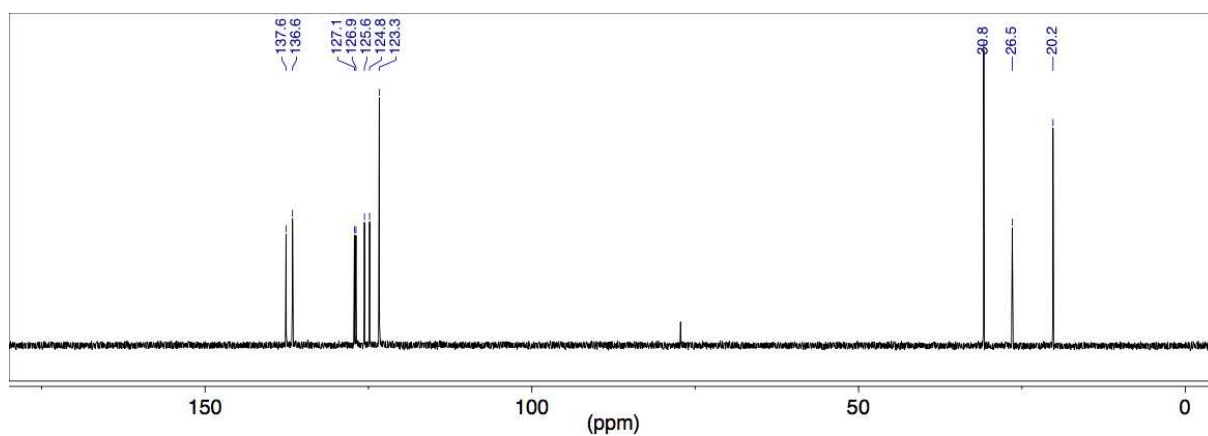

**Figure S2:**  $^1\text{H}$ ,  $^{13}\text{C}$  and DEPT NMR spectra of complex C2.

[Cu(2,9-(4-(*tert*-butyl)-2,6-dimethylphenyl)-1,10-phenanthroline)(bathophenanthroline)]PF<sub>6</sub> (**C3**)

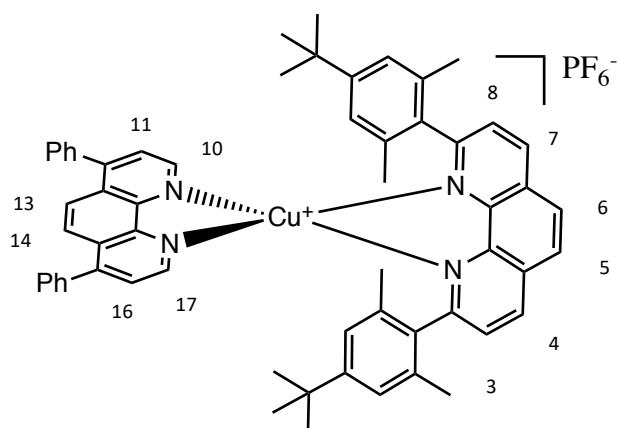

Chemical formula: C<sub>60</sub>H<sub>56</sub>CuF<sub>6</sub>N<sub>4</sub>P

Exact mass: 1040.34

Molecular weight: 1041.65

Complex **C3** was synthesised using the same method as for **C1**, with the addition of bathophenanthroline (57 mg, 0.17 mmol) as opposed to 1,10-phenanthroline. Complex **C3** was isolated as orange-red plates (120 mg, 0.12 mmol, 75%).

<sup>1</sup>H NMR (500 MHz, CDCl<sub>3</sub>) δ 8.72 (d, *J* = 8.3 Hz, 2H, H<sub>4</sub> and H<sub>7</sub>), 8.62 (d, *J* = 4.9 Hz, 2H, H<sub>10</sub> and H<sub>17</sub>), 8.24 (s, 2H, H<sub>5</sub> and H<sub>6</sub>), 7.84 (d, *J* = 8.3 Hz, 2H, H<sub>3</sub> and H<sub>8</sub>), 7.83 (s, 2H, H<sub>13</sub> and H<sub>14</sub>), 7.69 (d, *J* = 4.9 Hz, 2H, H<sub>11</sub> and H<sub>16</sub>), 7.60 – 7.55 (m, 6H, H<sub>meta</sub> and H<sub>para</sub>), 7.51 – 7.45 (m, 4H, H<sub>ortho</sub>), 6.22 (s, 4H, H<sub>Ar</sub>), 1.83 (s, 12H, H<sub>Me</sub>), 0.64 (s, 18H, H<sub>tBu</sub>).

<sup>13</sup>C NMR (125 MHz, CDCl<sub>3</sub>) δ 158.9, 150.9, 148.7, 147.4 (CH), 143.9, 143.4, 137.5 (CH), 137.4, 136.3, 134.5 (CH), 129.5 (CH), 129.4, 129.1 (CH), 128.0, 126.9 (CH), 126.3 (CH), 126.0, 124.9 (CH), 124.3 (CH), 123.1 (CH), 33.7, 30.8 (CH<sub>3</sub>), 20.6 (CH<sub>3</sub>).

Anal. calcd for C<sub>60</sub>H<sub>56</sub>CuF<sub>6</sub>N<sub>4</sub>P·H<sub>2</sub>O: C, 67.68; H, 5.52; N, 5.29. Found: C, 67.68; H, 5.33; N, 5.27.

Crystal data from Et<sub>2</sub>O/CH<sub>2</sub>Cl<sub>2</sub> for **C3**. C<sub>60</sub>H<sub>56</sub>CuF<sub>6</sub>N<sub>4</sub>P, *M* = 1041.59 g·mol<sup>-1</sup> monoclinic, space group P2<sub>1</sub>/c, *a* = 10.9274(3) Å, *b* = 22.7485(6) Å, *c* = 21.5054(6) Å, α = 90°, β = 107.212(2)°, γ = 90°, *V* = 5106.4(2) Å<sup>3</sup>, *Z* = 4, ρ<sub>calc</sub> = 1.355 Mg/m<sup>3</sup>, *T* = 173(2) K, MoKα = 1.54178 Å, 2.898 < θ < 66.688, transmission factors: *T*<sub>min</sub>/*T*<sub>max</sub> = 0.6010/0.7528, 65968 reflections measured, 8989 unique reflections, *R*<sub>1</sub> = 0.0658, *wR*<sub>2</sub> = 0.1478, GoF = 1.028.



### C3: $^1\text{H}$ NMR

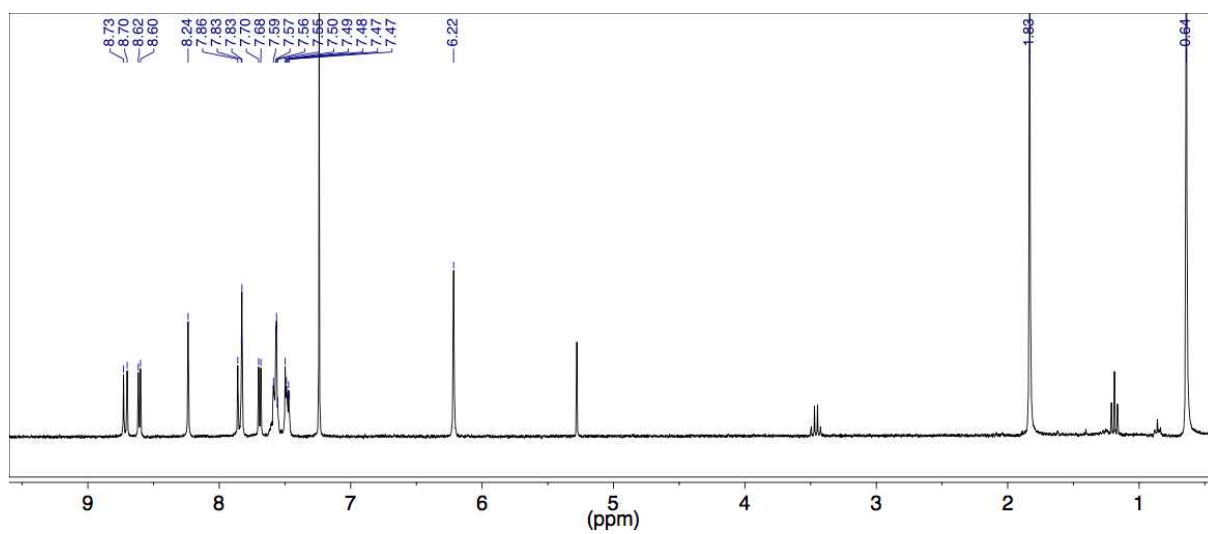

### C3: $^{13}\text{C}$ NMR

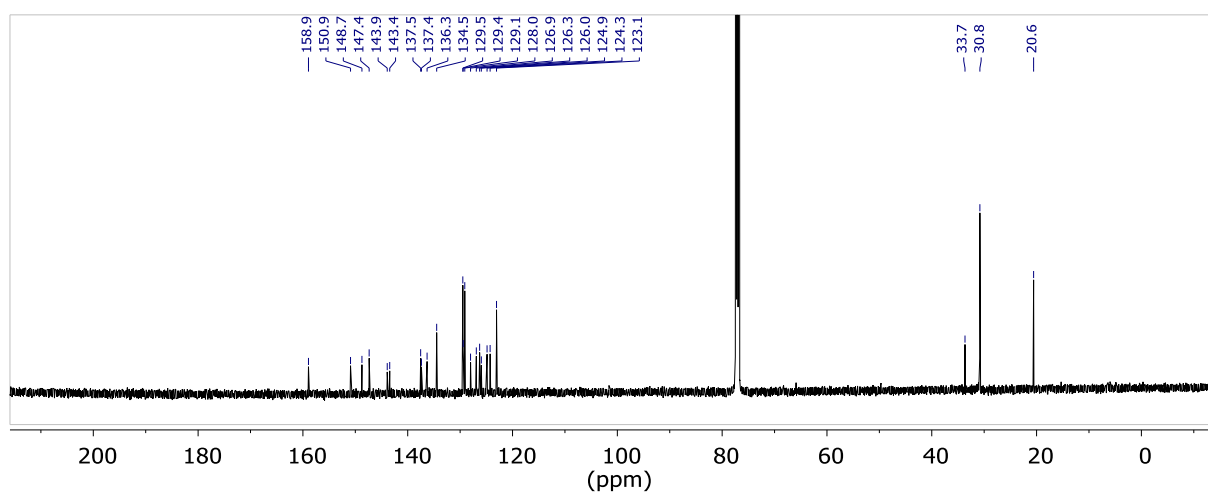

### C3: DEPT 135

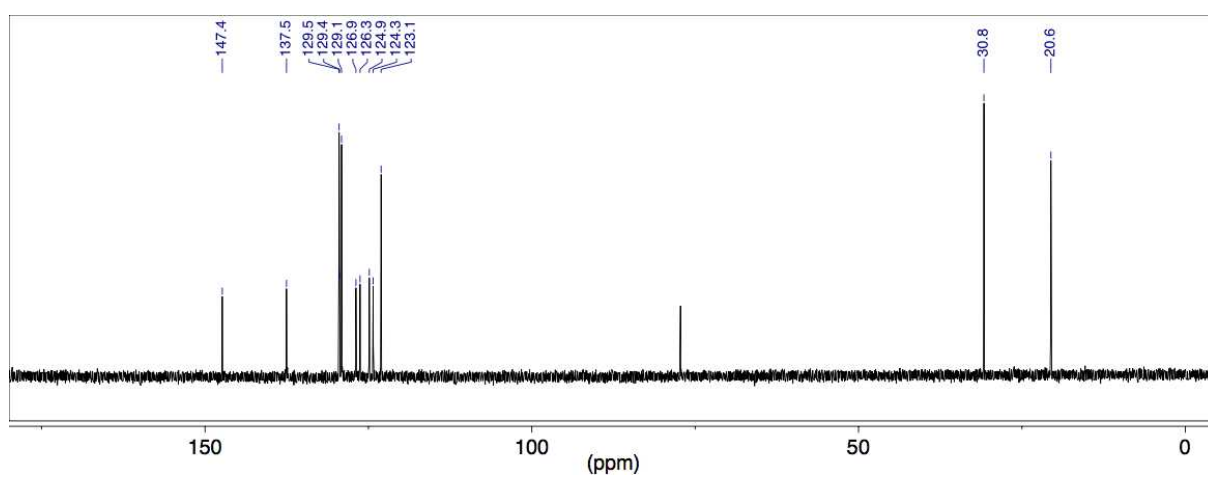

Figure S3:  $^1\text{H}$ ,  $^{13}\text{C}$  and DEPT NMR spectra of complex C3.

[Cu(2,9-(4-(*tert*-butyl)-2,6-dimethylphenyl)-1,10-phenanthroline)(bathocuproine)]PF<sub>6</sub> (**C4**)

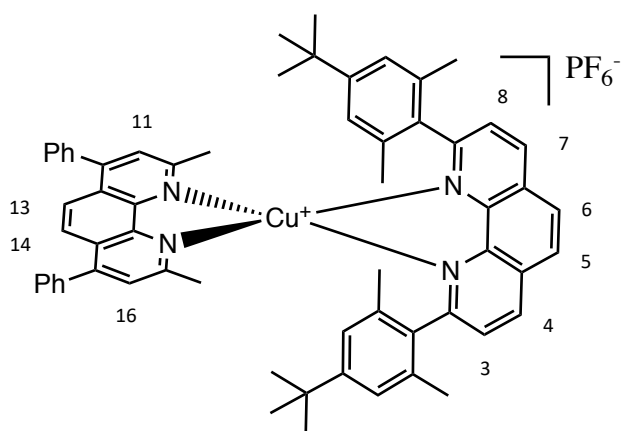

Chemical formula: C<sub>60</sub>H<sub>60</sub>CuF<sub>6</sub>N<sub>4</sub>P

Exact mass: 1068.38

Molecular weight: 1069.70

Complex **C4** was synthesised using the same method as for **C1**, with the addition of bathocuproine (50 mg, 0.14 mmol) as opposed to 1,10-phenanthroline to yield **C4** (86 mg, 0.080 mmol, 50%).

<sup>1</sup>H NMR (500 MHz, CDCl<sub>3</sub>) δ 8.75 (d, *J* = 8.2 Hz, 2H, H<sub>4</sub> and H<sub>7</sub>), 8.27 (s, 2H, H<sub>5</sub> and H<sub>6</sub>), 7.86 (d, *J* = 8.2 Hz, 2H, H<sub>3</sub> and H<sub>8</sub>), 7.77 (s, 2H, H<sub>11</sub> and H<sub>16</sub>), 7.56 - 7.44 (m, 12H, H<sub>ph</sub>, H<sub>13</sub> and H<sub>14</sub>), 6.36 (s, 4H, H<sub>Ar</sub>), 2.27 (s, 6H, H<sub>Me</sub>), 1.74 (s, 12H, H<sub>Me</sub>), 0.77 (s, 18H, H<sub>tBu</sub>).

<sup>13</sup>C NMR (125 MHz, CDCl<sub>3</sub>) δ 159.3, 156.3, 151.2, 148.9, 143.8, 143.2, 137.8 (CH), 136.8, 136.5, 134.5, 129.5 (CH), 129.3 (CH), 129.0 (CH), 128.3, 127.3 (CH), 126.9 (CH), 125.1 (CH), 124.5, 123.3 (CH), 123.3 (CH), 33.8, 31.0 (CH<sub>3</sub>), 26.8 (CH<sub>3</sub>), 20.4 (CH<sub>3</sub>).

MS ESI: calcd for C<sub>62</sub>H<sub>60</sub>CuN<sub>4</sub> (M – PF<sub>6</sub>)<sup>+</sup> 923.41; obsd 923.42.

Crystal data from Et<sub>2</sub>O/CH<sub>2</sub>Cl<sub>2</sub> for **C4**. C<sub>62</sub>H<sub>60</sub>CuF<sub>6</sub>N<sub>4</sub>P, *M* = 1069.65 g.mol<sup>-1</sup>, monoclinic, space group P2<sub>1</sub>/c, *a* = 11.1445(5) Å, *b* = 21.9682(9) Å, *c* = 22.5256(9) Å, α = 90°, β = 108.285(3)°, γ = 90°, *V* = 5236(4) Å<sup>3</sup>, *Z* = 4, ρ<sub>calc</sub> = 1.357 Mg/m<sup>3</sup>, *T* = 173(2) K, MoKα = 0.71073, 2.4390 < θ < 24.30, transmission factors: *T*<sub>min</sub>/*T*<sub>max</sub> = 0.6331/0.7456, 12676 reflections measured, 7892 unique reflections, *R*<sub>1</sub> = 0.0564, *wR*<sub>2</sub> = 0.1135, GoF = 1.050.

**C4:  $^1\text{H}$  NMR**

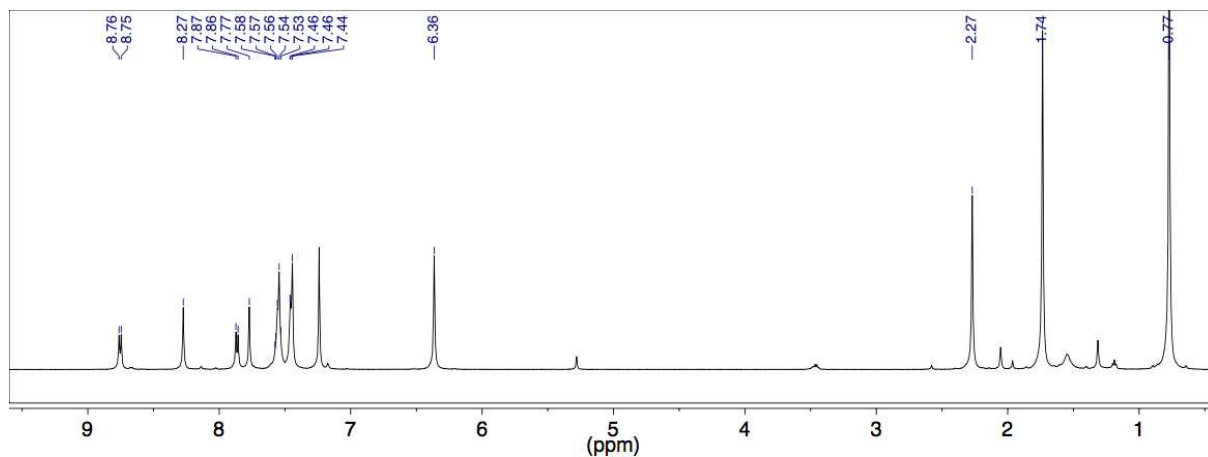

**C4:  $^{13}\text{C}$  NMR**

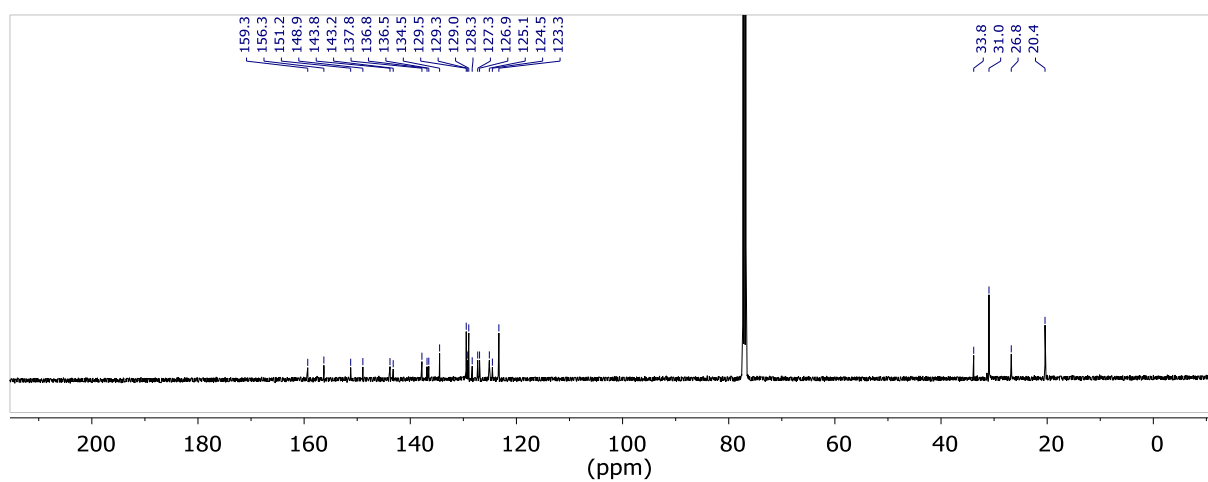

**C4: DEPT 135**

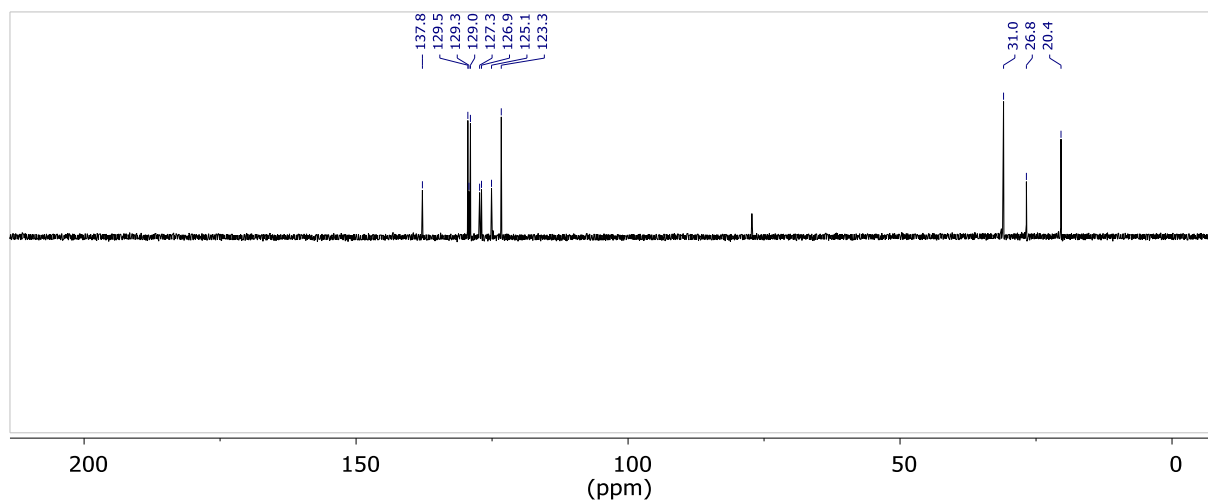

**Figure S4:**  $^1\text{H}$ ,  $^{13}\text{C}$  and DEPT NMR spectra of complex C4.

Cu(2,9-(4-(*tert*-butyl)-2,6-dimethylphenyl)-1,10-phenanthroline)(3,4,7,8-tetramethyl-1,10-phenanthroline)]PF<sub>6</sub> (**C5**)

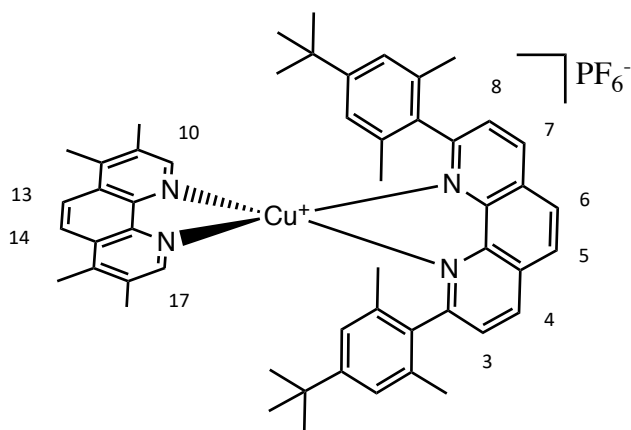

Chemical formula: C<sub>52</sub>H<sub>56</sub>CuF<sub>6</sub>N<sub>4</sub>P

Exact mass: 944.34

Molecular weight: 945.56

Complex **C5** was synthesised using the same method as for **C1**, with the addition of 3,4,5,6-tetramethyl-1,10-phenanthroline (40 mg, 0.17 mmol) as opposed to 1,10-phenanthroline to yield **C5** (127 mg, 0.13 mmol, 83%).

<sup>1</sup>H NMR (500 MHz, CDCl<sub>3</sub>) δ 8.70 (d, *J* = 8.2 Hz, 2H, H<sub>4</sub> and H<sub>7</sub>), 8.23 (s, 2H, H<sub>10</sub> and H<sub>17</sub>), 8.22 (s, 2H, H<sub>5</sub> and H<sub>6</sub>), 7.94 (s, 2H, H<sub>13</sub> and H<sub>14</sub>), 7.84 (d, *J* = 8.2 Hz, 2H, H<sub>3</sub> and H<sub>8</sub>), 6.17 (s, 4H, H<sub>Ar</sub>), 2.65 (s, 6H, H<sub>Me</sub> of phenanthroline), 2.49 (s, 6H, H<sub>Me</sub> of phenanthroline), 1.80 (s, 12H, H<sub>Me</sub> of aryl), 0.65 (s, 18H H<sub>tBu</sub>).

<sup>13</sup>C NMR (125 MHz, CDCl<sub>3</sub>) δ 158.8, 150.8, 148.7 (CH), 143.9, 142.5, 141.7, 137.2 (CH), 137.0, 134.3, 132.2, 128.0, 126.9 (CH), 126.5, 126.4 (CH), 123.2 (CH), 122.3 (CH), 33.6, 30.6 (CH<sub>3</sub>), 20.4 (CH<sub>3</sub>), 17.5 (CH<sub>3</sub>), 14.7 (CH<sub>3</sub>).

MS ESI: calcd for C<sub>52</sub>H<sub>56</sub>CuN<sub>4</sub> (M – PF<sub>6</sub>)<sup>+</sup> 799.38; obsd 799.38.

### C5: $^1\text{H}$ NMR

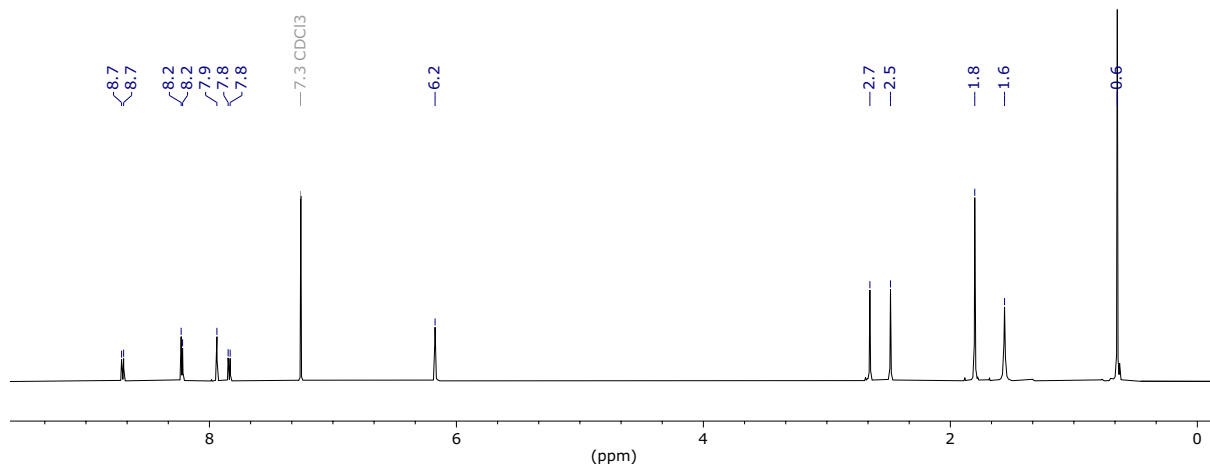

### C5: $^{13}\text{C}$ NMR

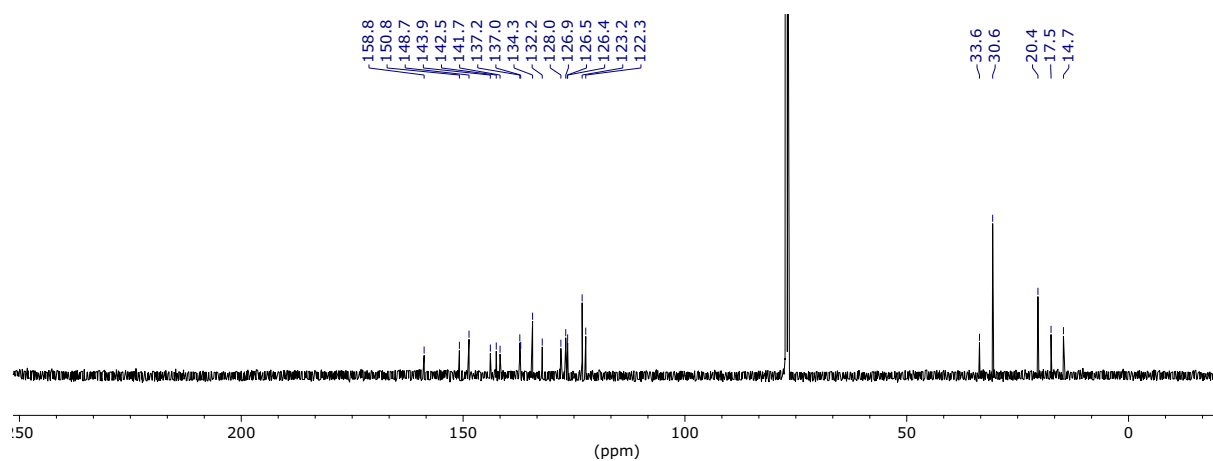

### C5: DEPT

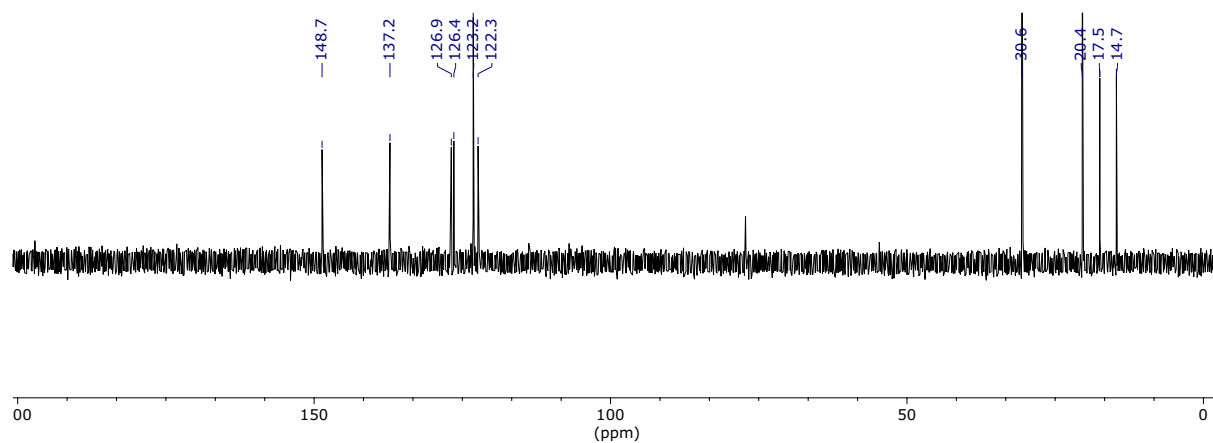

Figure S5:  $^1\text{H}$ ,  $^{13}\text{C}$  and DEPT NMR spectra of complex C5.

[Cu(2,9-(4-(*tert*-butyl)-2,6-dimethylphenyl)-1,10-phenanthroline)(4,4'-dimethyl-2,2'-bipyridine)]PF<sub>6</sub> (**C6**)

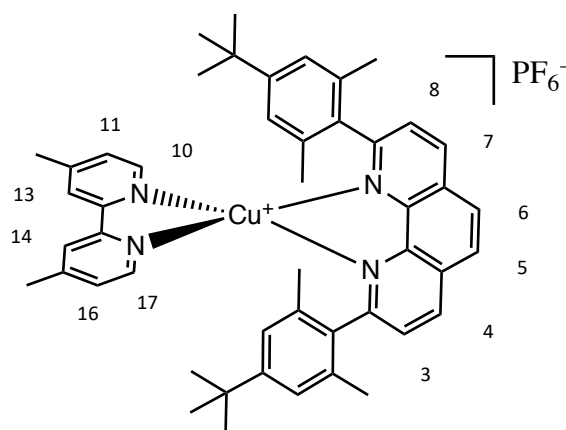

Chemical formula: C<sub>48</sub>H<sub>52</sub>CuF<sub>6</sub>N<sub>4</sub>P

Exact mass: 892.31

Molecular weight: 893.48

Complex **C6** was obtained by using the procedure followed for **C1**, replacing 1,10-phenanthroline by 4,4'-dimethyl-2,2'-bipyridine (35 mg 0.17 mmol). Complex **C6** was isolated as an orange-red solid (96 mg, 0.13 mmol, 83%).

<sup>1</sup>H NMR (500 MHz, CDCl<sub>3</sub>) δ 8.64 (d, *J* = 8.1 Hz, 2H, H<sub>4</sub> and H<sub>7</sub>), 8.16 (s, 2H, H<sub>5</sub> and H<sub>6</sub>), 7.94 (d, *J* = 5.2 Hz, 2H, H<sub>10</sub> and H<sub>17</sub>), 7.81 (d, *J* = 8.1 Hz, 2H, H<sub>3</sub> and H<sub>8</sub>), 7.57 (s, 2H, H<sub>13</sub> and H<sub>14</sub>), 7.15 (d, *J* = 5.2 Hz, 2H, H<sub>11</sub> and H<sub>16</sub>), 6.43 (s, 4H, H<sub>Ar</sub>), 2.43 (s, 6H, H<sub>Me</sub>), 1.76 (s, 12H, H<sub>Me</sub>), 0.96 (s, 18H, H<sub>tBu</sub>).

<sup>13</sup>C NMR (125 MHz, CDCl<sub>3</sub>) δ 158.9, 151.1, 150.8, 148.9, 147.6 (CH), 143.8, 137.1 (CH), 137.0, 134.4, 127.8, 126.7 (CH), 126.4 (CH), 126.0 (CH), 123.6 (CH), 121.4 (CH), 34.0, 31.0 (CH<sub>3</sub>), 21.3 (CH<sub>3</sub>), 20.5 (CH<sub>3</sub>).

Anal. calcd for C<sub>48</sub>H<sub>52</sub>CuF<sub>6</sub>N<sub>4</sub>P.H<sub>2</sub>O: C, 64.53; H, 5.87; N, 6.27. Found: C, 64.24; H, 5.87; N, 6.23.

Crystal data from Et<sub>2</sub>O/CH<sub>2</sub>Cl<sub>2</sub> for **C6**. C<sub>48</sub>H<sub>52</sub>CuF<sub>6</sub>N<sub>4</sub>P, *M* = 893.44 g.mol<sup>-1</sup>, orthorhombic, space group Pbca, *a* = 20.1400(4) Å, *b* = 19.3338(4) Å, *c* = 23.5931(4) Å, α = 90°, β = 90°, γ = 90°, *V* = 9186.7(3) Å<sup>3</sup>, *Z* = 8, ρ<sub>calc</sub> = 1.292 Mg/m<sup>3</sup>, *T* = 173(2) K, MoKα = 0.71073, 3.68 < θ < 63.84, transmission factors: *T*<sub>min</sub>/*T*<sub>max</sub> = 0.5553/0.7528, 8127 reflections measured, 5749 unique reflections, *R*<sub>1</sub> = 0.0606, *wR*<sub>2</sub> = 0.1595, GoF = 1.048

### C6: $^1\text{H}$ NMR

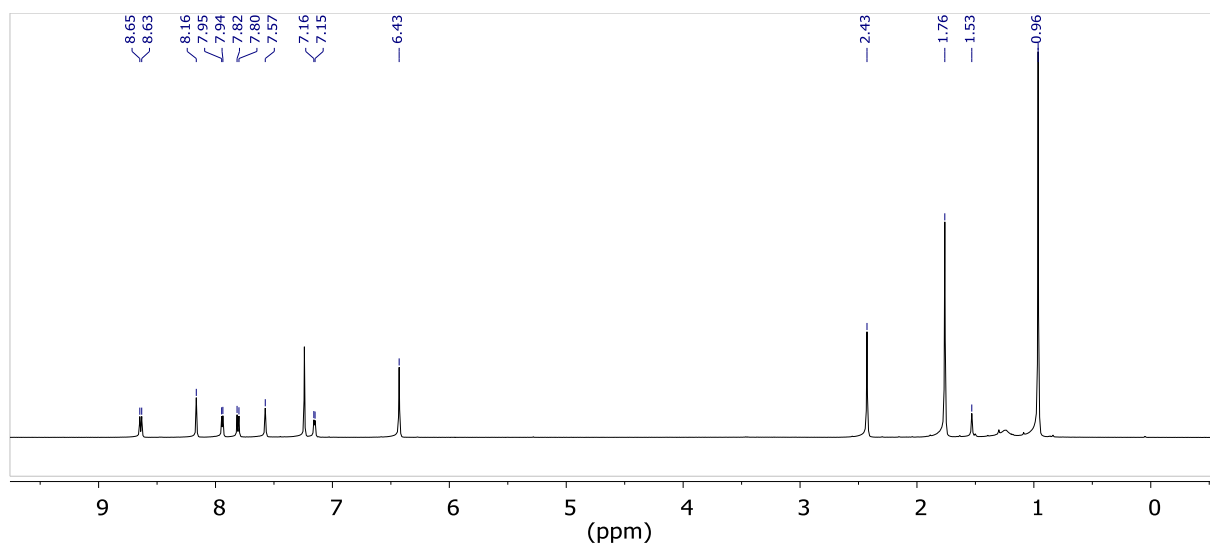

### C6: $^{13}\text{C}$ NMR

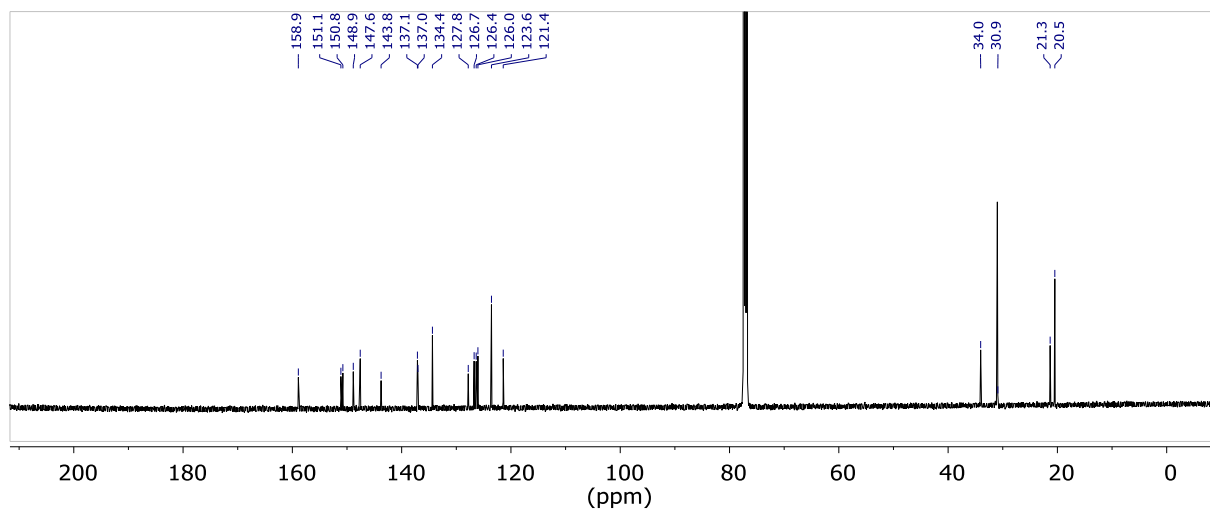

### C6: DEPT 135

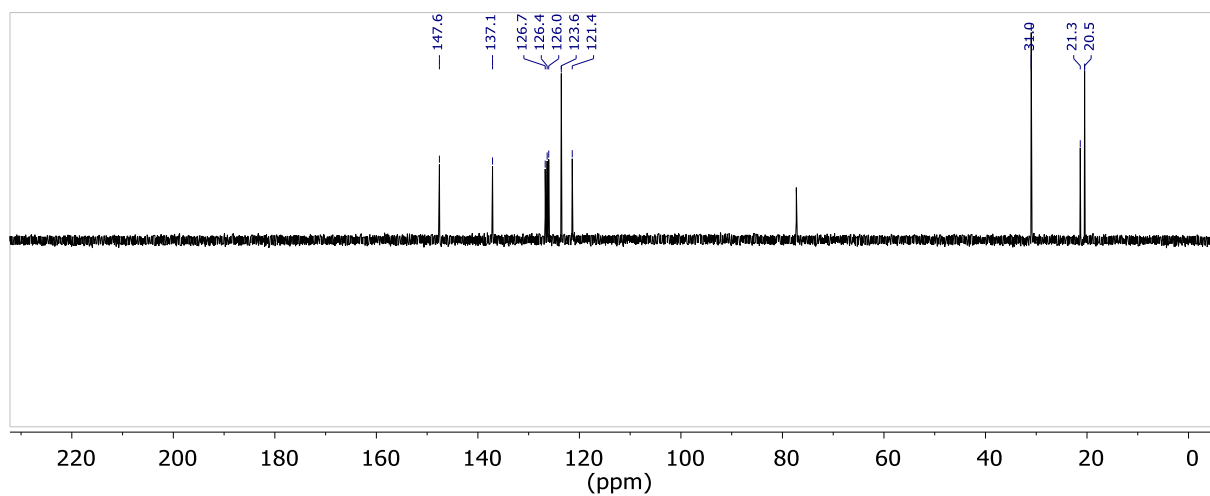

Figure S6:  $^1\text{H}$ ,  $^{13}\text{C}$  and DEPT NMR spectra of complex C6.

[Cu(2,9-(4-(*tert*-butyl)-2,6-dimethylphenyl)-1,10-phenanthroline)(4,4'-(*tert*-butyl)-2,2'-bipyridine)]PF<sub>6</sub> (**C7**)

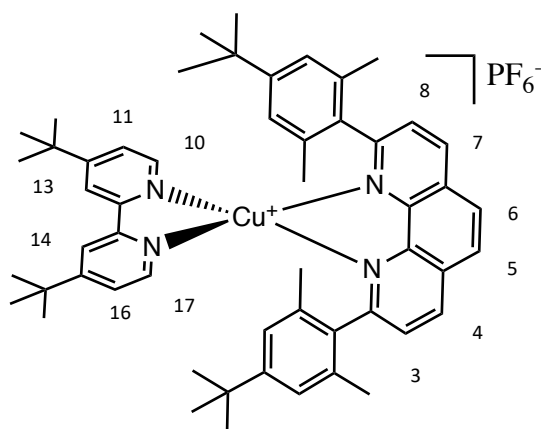

Chemical formula: C<sub>54</sub>H<sub>64</sub>CuF<sub>6</sub>N<sub>4</sub>P

Exact mass: 976.41

Molecular weight: 977.64

Complex **C7** was obtained by using the procedure followed for **C1**, replacing 1,10-phenanthroline by 4,4'-ditert-butyl-2,2'-bipyridine (46 mg, 0.17 mmol). Complex **C7** was isolated as an orange-red solid in 83% yield (85 mg, 0.087 mmol, 54%).

<sup>1</sup>H NMR (500 MHz, CDCl<sub>3</sub>) δ 8.70 (d, *J* = 8.2 Hz, 2H, H<sub>4</sub> and H<sub>7</sub>), 8.23 (s, 2H, H<sub>5</sub> and H<sub>6</sub>), 8.12 (d, *J* = 5.5 Hz, 2H, H<sub>10</sub> and H<sub>17</sub>), 7.84 (d, *J* = 8.2 Hz, 2H, H<sub>3</sub> and H<sub>8</sub>), 7.64 (d, *J* = 1.8 Hz, 2H, H<sub>13</sub> and H<sub>14</sub>), 7.42 (dd, *J* = 5.6, 1.8 Hz, 2H, H<sub>11</sub> and H<sub>16</sub>), 6.42 (s, 4H, H<sub>Ar</sub>), 1.81 (s, 12H, H<sub>Me</sub>), 1.43 (s, 18H, H<sub>tBu</sub>), 0.99 (s, 18H, H<sub>tBu</sub>).

<sup>13</sup>C NMR (125 MHz, CDCl<sub>3</sub>) δ 161.4, 158.8, 150.9, 150.9, 148.1 (CH), 143.8, 137.3 (CH), 137.3 (CH), 134.5, 127.9, 126.8 (CH), 126.3 (CH), 123.3 (CH), 122.6 (CH), 116.6 (CH), 35.3, 34.0, 31.1 (CH), 30.5 (CH), 20.5 (CH).

MS ESI: calcd for C<sub>54</sub>H<sub>64</sub>CuN<sub>4</sub> (M – PF<sub>6</sub>)<sup>+</sup> 831.44 obsd 831.44



### C7: $^1\text{H}$ NMR

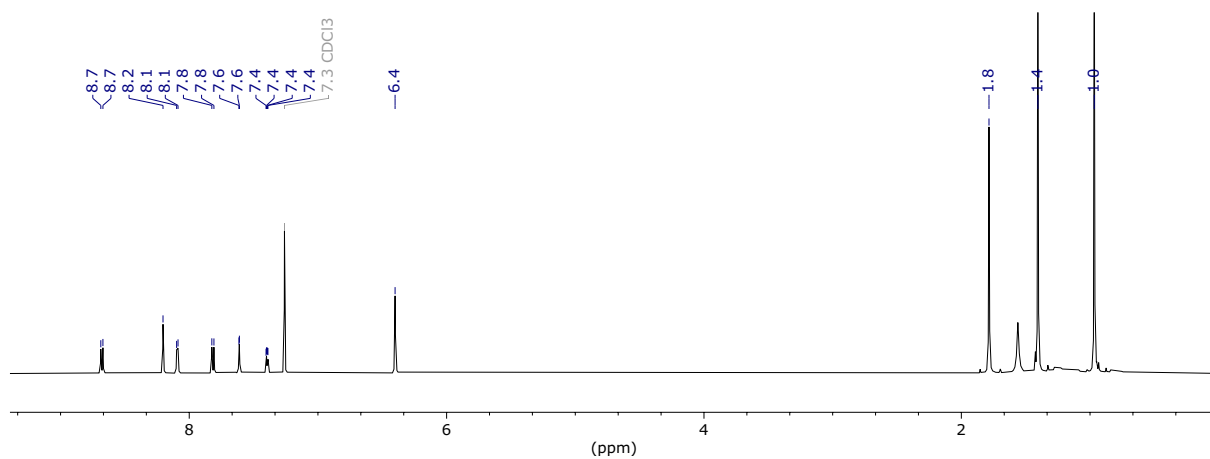

### C7: $^{13}\text{C}$ NMR

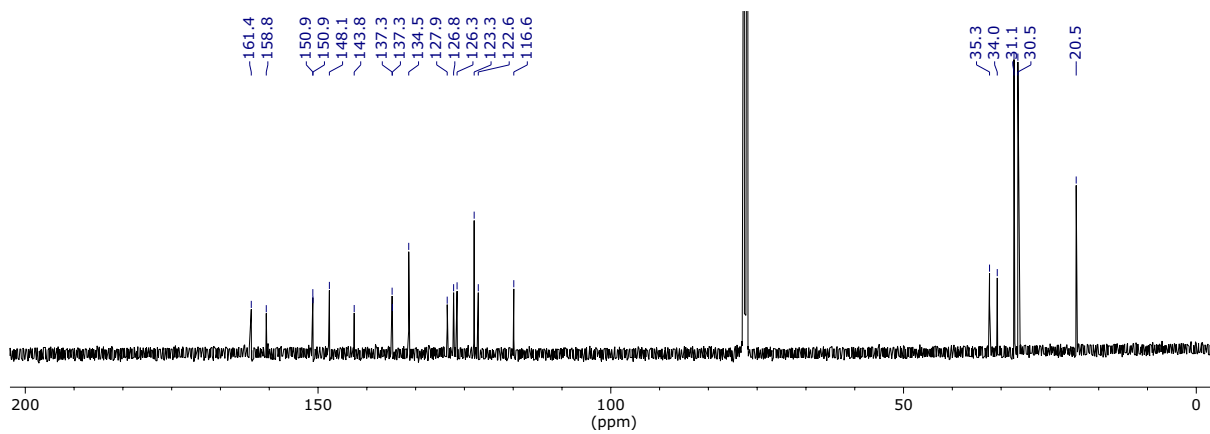

### C7: DEPT

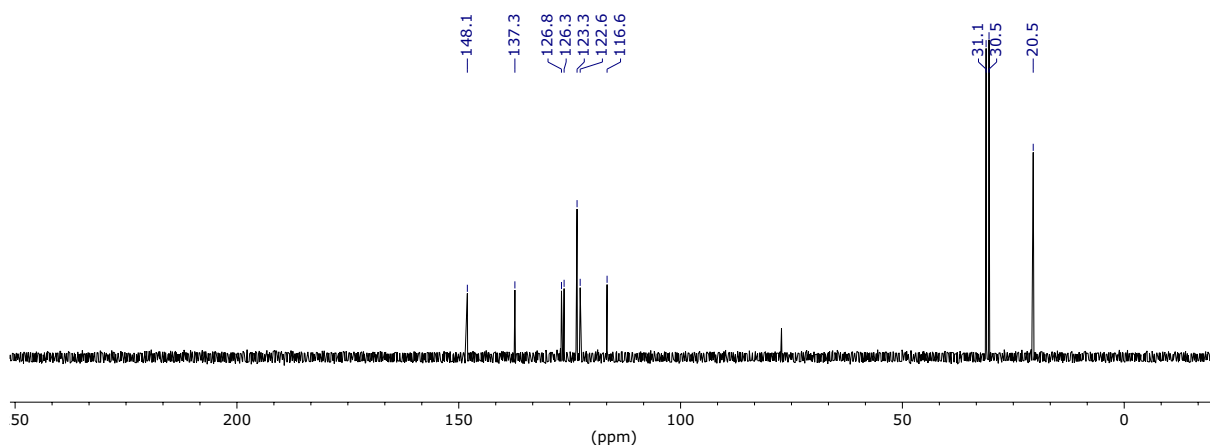

Figure S7:  $^1\text{H}$ ,  $^{13}\text{C}$  and DEPT NMR spectra of complex C7.

[Cu(2,9-(4-(*tert*-butyl)-2,6-dimethylphenyl)-1,10-phenanthroline)(dipyridophenazine)]PF<sub>6</sub> (**C8**)

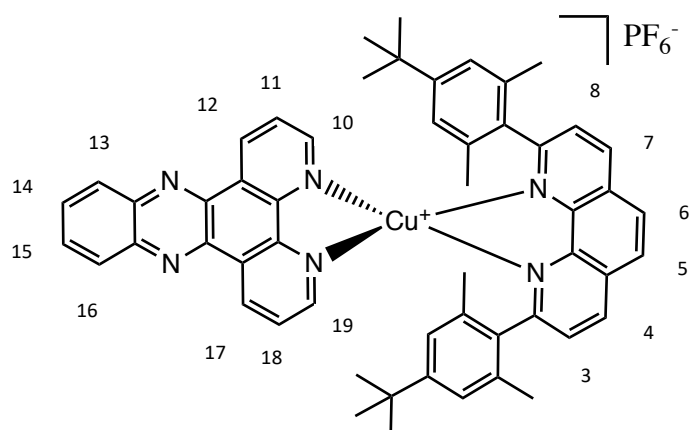

Chemical formula: C<sub>54</sub>H<sub>50</sub>CuF<sub>6</sub>N<sub>4</sub>P

Exact mass: 990.30

Molecular weight: 991.55

Complex **C8** was synthesised using the same method as for **C1**, with the addition of dipyridophenazine (44 mg, 0.16 mmol) as opposed to 1,10-phenanthroline to yield **C8** (100 mg, 0.10 mmol, 63%).

<sup>1</sup>H NMR (500 MHz, CDCl<sub>3</sub>) δ 9.64 (dd, *J* = 8.1, 1.5 Hz, 2H, H<sub>10</sub> and H<sub>19</sub>), 8.72 (d, *J* = 8.2 Hz, 2H, H<sub>4</sub> and H<sub>7</sub>), 8.66 (dd, *J* = 4.9, 1.5 Hz, 2H, H<sub>12</sub> and H<sub>18</sub>), 8.42 (dd, *J* = 6.5, 3.5 Hz, 2H, H<sub>13</sub> and H<sub>16</sub>), 8.25 (s, 2H, H<sub>5</sub> and H<sub>6</sub>), 8.04 (dd, *J* = 6.5, 3.5 Hz, 2H, H<sub>14</sub> and H<sub>15</sub>), 7.95 (dd, *J* = 8.1, 4.9 Hz, 2H, H<sub>11</sub> and H<sub>18</sub>), 7.85 (d, *J* = 8.2 Hz, 2H, H<sub>3</sub> and H<sub>7</sub>), 6.23 (s, 4H, H<sub>Ar</sub>), 1.83 (s, 12H, H<sub>Me</sub>), 0.41 (s, 18H, H<sub>tBu</sub>).

<sup>13</sup>C NMR (125 MHz, CDCl<sub>3</sub>) δ 159.0, 151.1, 149.5 (CH), 144.7, 143.9, 142.6, 139.6, 137.6 (CH), 137.2, 134.5, 133.7 (CH), 131.7 (CH), 129.7 (CH), 128.0, 127.8, 126.9 (CH), 126.4 (CH), 125.9 (CH), 123.2 (CH), 33.5, 30.4 (CH), 20.5 (CH).

MS ESI: calcd for C<sub>54</sub>H<sub>50</sub>CuN<sub>6</sub> (M – PF<sub>6</sub>)<sup>+</sup> 845.34; obsd 845.34.

Crystal data from Et<sub>2</sub>O/CH<sub>2</sub>Cl<sub>2</sub> for **C8**. C<sub>56</sub>H<sub>54</sub>Cl<sub>4</sub>CuF<sub>6</sub>N<sub>4</sub>P, *M* = 1161.36 g.mol<sup>-1</sup>, monoclinic, space group P 2<sub>1</sub>/c, *a* = 10.5002(4) Å, *b* = 40.819(2) Å, *c* = 12.7406(6) Å, α = 90°, β = 96.385(2)°, γ = 90°, *V* = 5426.9(4) Å<sup>3</sup>, *Z* = 4, ρ<sub>calc</sub> = 1.421 Mg/m<sup>3</sup>, *T* = 120(2) K, MoK<sub>α</sub> = 0.71073, 2.20 < θ < 27.87, transmission factors: *T*<sub>min</sub>/*T*<sub>max</sub> = 0.7151/0.7456, 13008 reflections measured, 10771 unique reflections, *R*<sub>1</sub> = 0.0597606, *wR*<sub>2</sub> = 0.1628, GoF = 1.033.

### C8: $^1\text{H}$ NMR

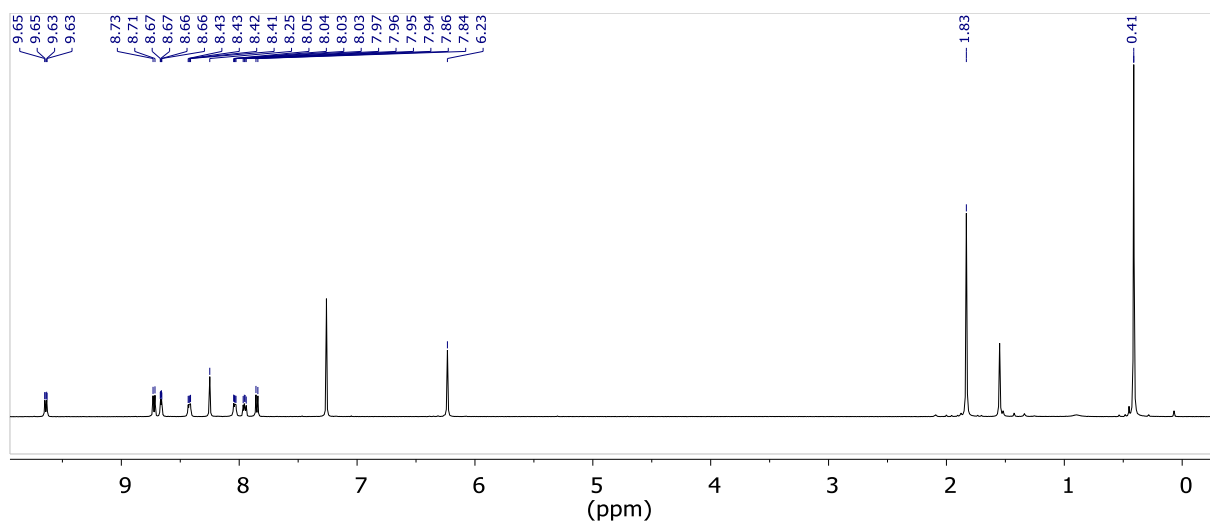

### C8: $^{13}\text{C}$ NMR

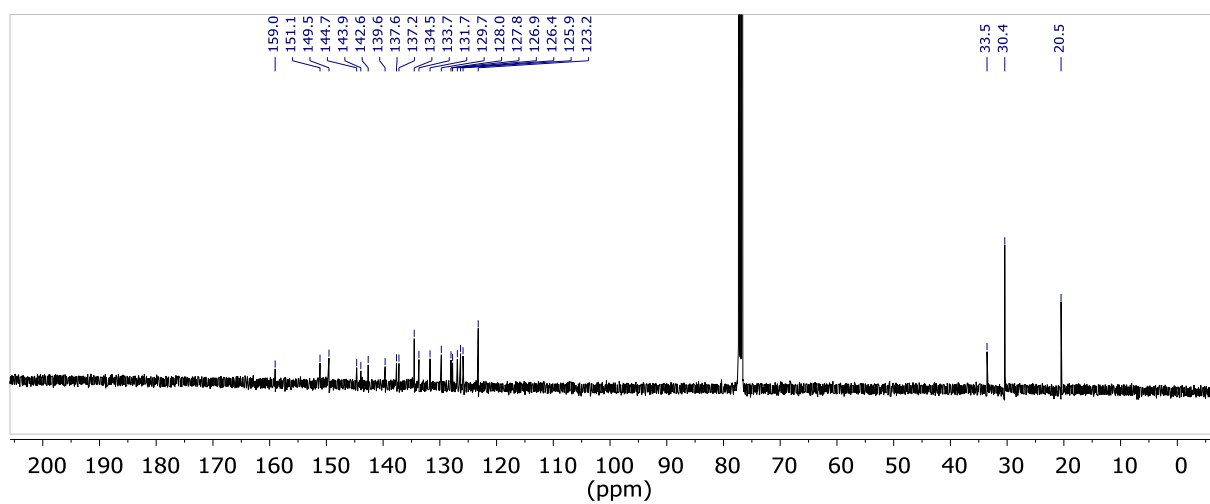

### C8: DEPT 135

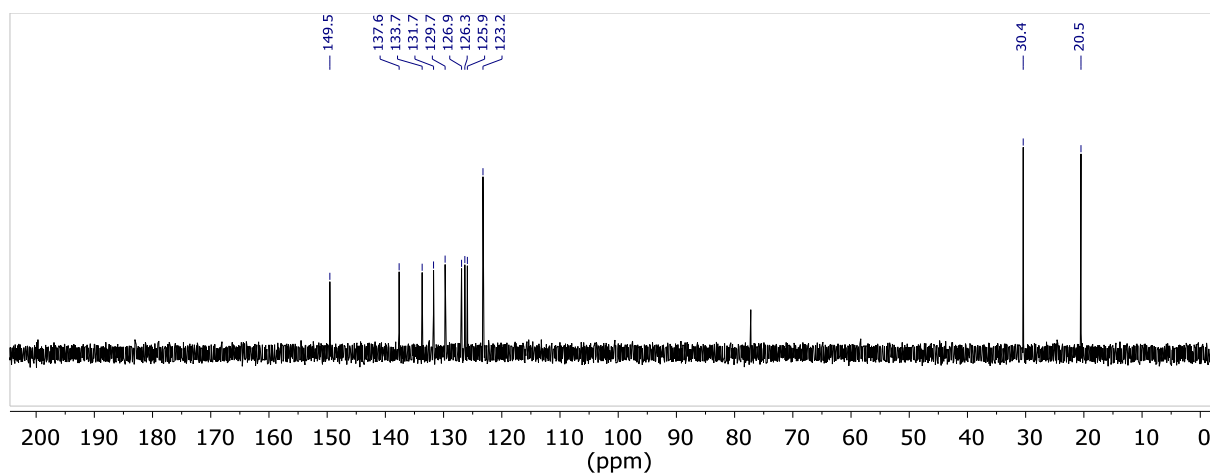

Figure S8:  $^1\text{H}$ ,  $^{13}\text{C}$  and DEPT NMR spectra of complex C8.

**X-ray structure informations.**

| Compound<br>Cif file | C2<br>jwja180321                                                                                   | C3<br>jwja180313                                                  | C4<br>jwja180417                                                  | C6<br>jwja180716                                                  | C8<br>jwja210204                                                                                   |
|----------------------|----------------------------------------------------------------------------------------------------|-------------------------------------------------------------------|-------------------------------------------------------------------|-------------------------------------------------------------------|----------------------------------------------------------------------------------------------------|
| CCDC Nr              | 2226783                                                                                            | 2226772                                                           | 2226784                                                           | 2226785                                                           | 2226786                                                                                            |
| Formula              | C <sub>50</sub> H <sub>52</sub> CuN <sub>4</sub> F <sub>6</sub> P,C <sub>4</sub> H <sub>10</sub> O | C <sub>60</sub> H <sub>56</sub> CuN <sub>4</sub> F <sub>6</sub> P | C <sub>62</sub> H <sub>60</sub> CuN <sub>4</sub> F <sub>6</sub> P | C <sub>48</sub> H <sub>52</sub> CuN <sub>4</sub> F <sub>6</sub> P | C <sub>54</sub> H <sub>50</sub> CuN <sub>6</sub> F <sub>6</sub> P,2CH <sub>2</sub> Cl <sub>2</sub> |
| Space<br>group       | P 2 <sub>1</sub> /c                                                                                | P 2 <sub>1</sub> /c                                               | P 2 <sub>1</sub> /c                                               | Pbca                                                              | P 2 <sub>1</sub> /c                                                                                |
| a                    | 13.4772(6)                                                                                         | 10.9274(3)                                                        | 11.1445(5)                                                        | 20.1400(4)                                                        | 10.5002(4)                                                                                         |
| b                    | 19.4894(8)                                                                                         | 22.7485(6)                                                        | 21.9682(9)                                                        | 19.3338(4)                                                        | 40.819(2)                                                                                          |
| c                    | 19.6875(9)                                                                                         | 21.5054(6)                                                        | 22.5256(9)                                                        | 23.5931(4)                                                        | 12.7406(6)                                                                                         |
| α                    | 90                                                                                                 | 90                                                                | 90                                                                | 90                                                                | 90                                                                                                 |
| β                    | 103.534(2)                                                                                         | 107.212(2)                                                        | 108.285(3)                                                        | 90                                                                | 96.385(2)                                                                                          |
| γ                    | 90                                                                                                 | 90                                                                | 90                                                                | 90                                                                | 90                                                                                                 |
| Cell volume          | 5027.57                                                                                            | 5106.45                                                           | 5236.36                                                           | 9186.75                                                           | 5426.85                                                                                            |
| Z                    | 4                                                                                                  | 4                                                                 | 4                                                                 | 8                                                                 | 4                                                                                                  |
| R-Factor<br>(%)      | 7.31                                                                                               | 6.58                                                              | 5.64                                                              | 6.06                                                              | 5.97                                                                                               |

## Detailed X-ray experimental procedures

The crystals were placed in oil, and a single crystal was selected, mounted on a glass fibre and placed in a low-temperature N<sub>2</sub> stream.

For compounds **jwja180321**, **jwja180417**, X-ray diffraction data collection was carried out on a Bruker APEX II DUO Kappa-CCD diffractometer equipped with an Oxford Cryosystem liquid N<sub>2</sub> device, using Mo-K $\alpha$  radiation ( $\lambda = 0.71073$  Å). The crystal-detector distance was 38mm. The cell parameters were determined (APEX3 software) [1] from reflections taken from three sets of 6 frames, each at 10s exposure. The structure was solved using the program SHELXT-2014 [2]. The refinement and all further calculations were carried out using SHELXL-2014 [3]. The H-atoms were included in calculated positions and treated as riding atoms using SHELXL default parameters. The non-H atoms were refined anisotropically, using weighted full-matrix least-squares on F<sup>2</sup>. A semi-empirical absorption correction was applied using SADABS in APEX3 [1]; transmission factors:  $T_{\min}/T_{\max} = 0.6888/0.7458$ ;  $T_{\min}/T_{\max} = 0.6331/0.7456$ , respectively for jwja180321, jwja180417. For jwja180321, the atoms F1, F2, F3, F4, F5, F6 of the hexafluorophosphate group are disordered over two positions with an occupancy ratio of 0.60/0.40.

For compounds **jwja180313**, **jwja180716**, X-Ray diffraction data collection was carried out on a Bruker APEX II DUO Kappa-CCD diffractometer equipped with an Oxford Cryosystem liquid N<sub>2</sub> device, using Cu-K $\alpha$  radiation ( $\lambda = 1.54178$  Å). The crystal-detector distance was 40 mm. The cell parameters were determined (APEX3 software) [1] from reflections taken from three sets of 6 frames, each at 10s exposure. The structure was solved using the program SHELXT-2014 [2]. The refinement and all further calculations were carried out using SHELXL-2014 [3]. The H-atoms were included in calculated positions and treated as riding atoms using SHELXL default parameters. The non-H atoms were refined anisotropically, using weighted full-matrix least-squares on F<sup>2</sup>. A semi-empirical absorption correction was applied using SADABS in APEX3 [1]; transmission factors:  $T_{\min}/T_{\max} = 0.6010/0.7528$ ;  $T_{\min}/T_{\max} = 0.5553/0.7528$ ; respectively for jwja180313, jwja180716. For jwja180716, the methyls C22, C23 are disordered over two positions with an occupancy ratio of 0.50/0.50 and the methyls C34, C35, C36 are disordered over two positions with an occupancy ratio of 0.65/0.35.

For compound **jwja210204**, X-Ray diffraction data collection was carried out on a Bruker PHOTON-III DUO CPAD diffractometer equipped with an Oxford Cryosystem liquid N<sub>2</sub> device, using Mo-K $\alpha$  radiation ( $\lambda$  = 0.71073 Å). The crystal-detector distance was 37 mm. The cell parameters were determined (APEX3 software) [1] from reflections taken from one set of 180 frames, each at 1s exposure. The structures were solved using the program SHELXT-2014 [2]. The refinement and all further calculations were carried out using SHELXL-2014 [3]. The H-atoms were included in calculated positions and treated as riding atoms using SHELXL default parameters. The non-H atoms were refined anisotropically, using weighted full-matrix least-squares on F<sup>2</sup>. A semi-empirical absorption correction was applied using SADABS in APEX3 [1]; transmission factors: T<sub>min</sub>/T<sub>max</sub> = 0.7151/0.7456.

The methyls C34, C35, C36 are disordered over two positions with an occupancy ratio of 0.50/0.50

[1] "M86-EXX229V1 APEX3 User Manual", Bruker AXS Inc., Madison, USA, 2016.

[2] G. M. Sheldrick, *Acta Cryst.* **2015**, A71, 3-8.

[3] G. M. Sheldrick, *Acta Cryst.* **2015**, C71, 3-8.

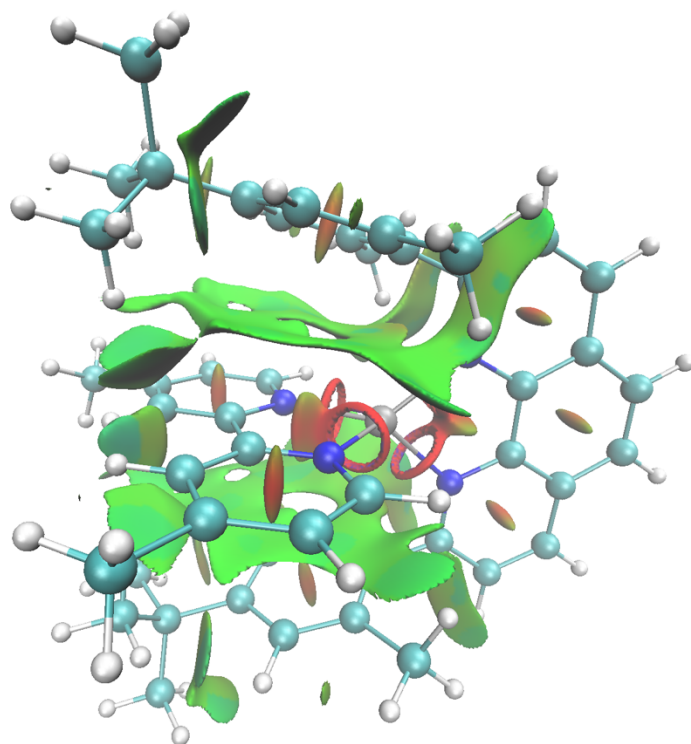

**NCI for compound C6**

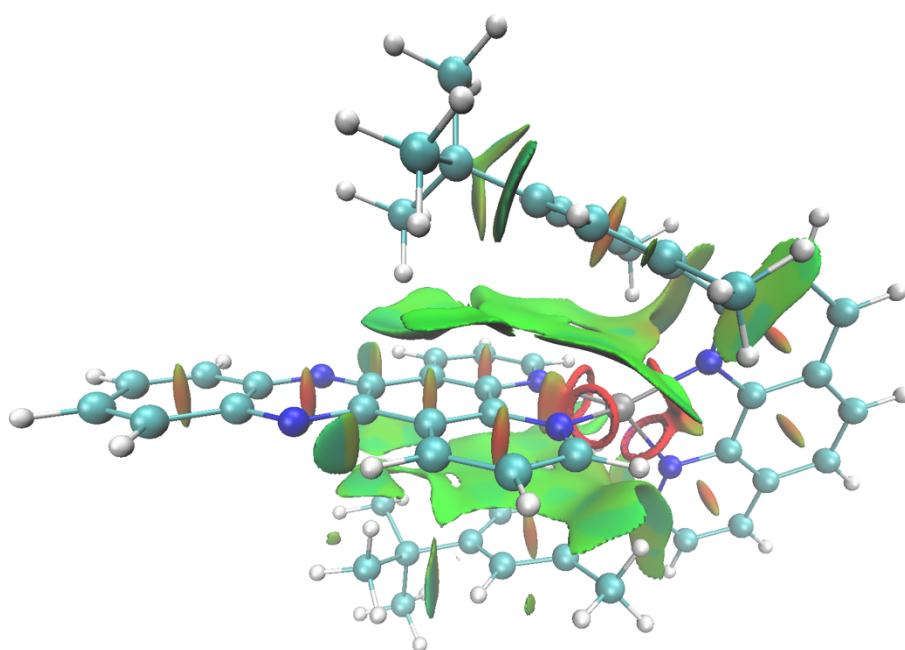

**NCI for compound 8**
